# Supplementary material for: Two Tautomers of Thiobarbituric Acid in One Crystal: The Experimental Charge Density Perspective
Source: MDPI journal article supplement (doi:10.3390/ma15010223), 2021-12-28
Supplement: s1 [file s1]

## Supplementary Materials

# Two Tautomers of Thiobarbituric Acid in One Crystal: The Experimental Charge Density Perspective

Anita M. Grzeškiewicz and Maciej Kubicki

Table of contents:

Figure S1. Residual density analysis for the TBA crystal blue whole range. red 0.8 Å.

Table S1. Rigid bond test results.

Figure S2. Residual electron density maps after IAM refinement.

Figure S3. Residual electron density maps after multipolar refinement.

Table S2. Bond critical point characteristics.

Table S3. Bond critical points for intermolecular interactions.

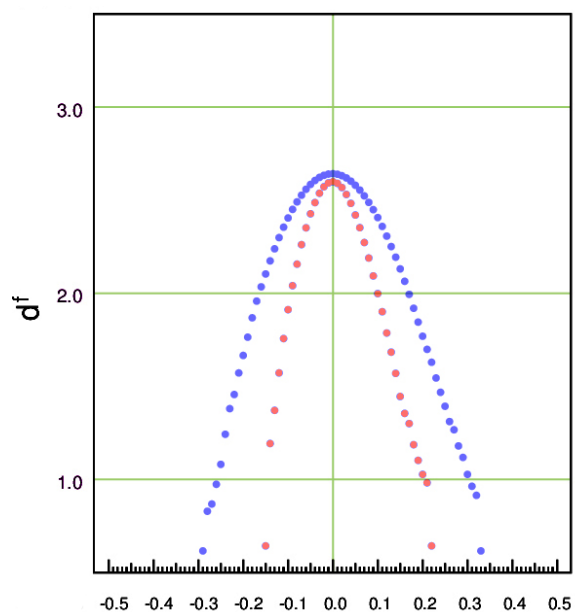

**Figure S1.** Residual density analysis for the TBA crystal blue whole range. red 0.8 Å.

**Table S1.** Rigid bond test result.

| Atom 1 | Atom 2 | $\Delta Z_{AB}^2$ |
|--------|--------|-------------------|
| N1     | C2     | -0.00036(30)      |
| N1     | C6     | -0.00027(41)      |
| S2     | C2     | -0.00019(29)      |
| C2     | N3     | 0.00012(42)       |
| N3     | C4     | -0.00027(45)      |
| O4     | C4     | 0.00019(45)       |
| C4     | C5     | 0.00039(31)       |
| C5     | C6     | -0.00040(41)      |
| O6     | C6     | -0.00002(36)      |
| S12    | C12    | -0.00004(29)      |
| N11    | C12    | -0.00011(30)      |
| N11    | C16    | -0.00030(39)      |
| C12    | N13    | 0.00028(40)       |
| N13    | C14    | -0.00048(43)      |
| O14    | C14    | 0.00002(49)       |
| C14    | C15    | -0.00020(33)      |
| C15    | C16    | 0.00045(39)       |
| O16    | C16    | 0.00015(31)       |
|        |        |                   |
| N1     | H1     | -0.00599(30)      |
| N3     | H3     | -0.00553(24)      |
| C5     | H5     | -0.00421(31)      |
| O6     | H6     | -0.00497(35)      |
| N11    | H11    | -0.00525(28)      |
| N13    | H13    | -0.00596(21)      |
| C15    | H15A   | -0.00390(30)      |
| C15    | H15B   | -0.00930(30)      |

**Figure S2.** Residual electron density maps after IAM refinement.

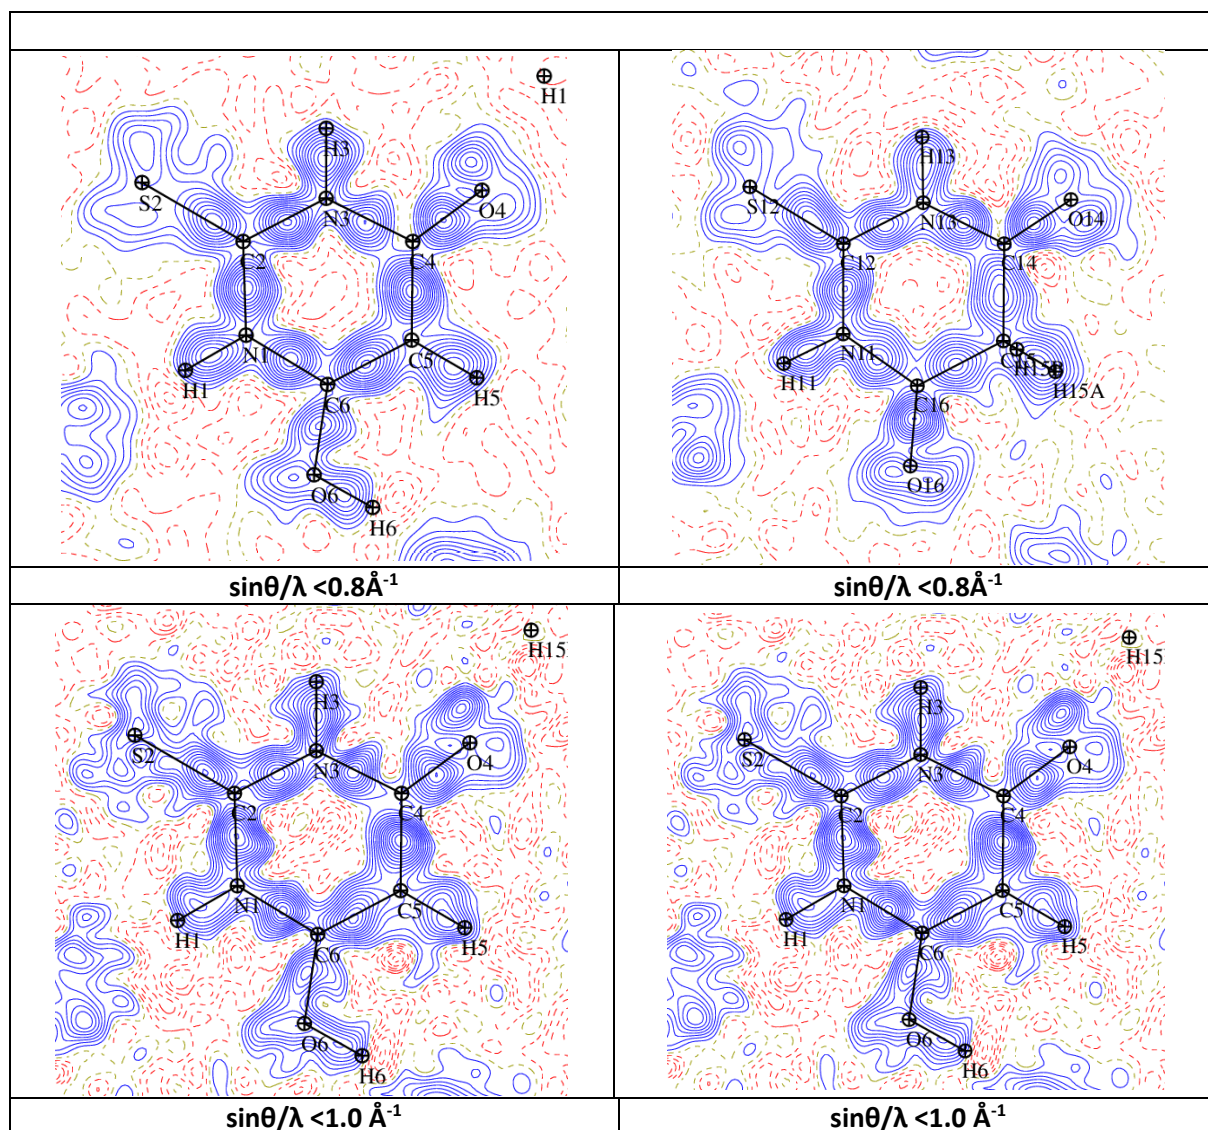

**Figure S3.** Residual electron density maps after multipolar refinement.

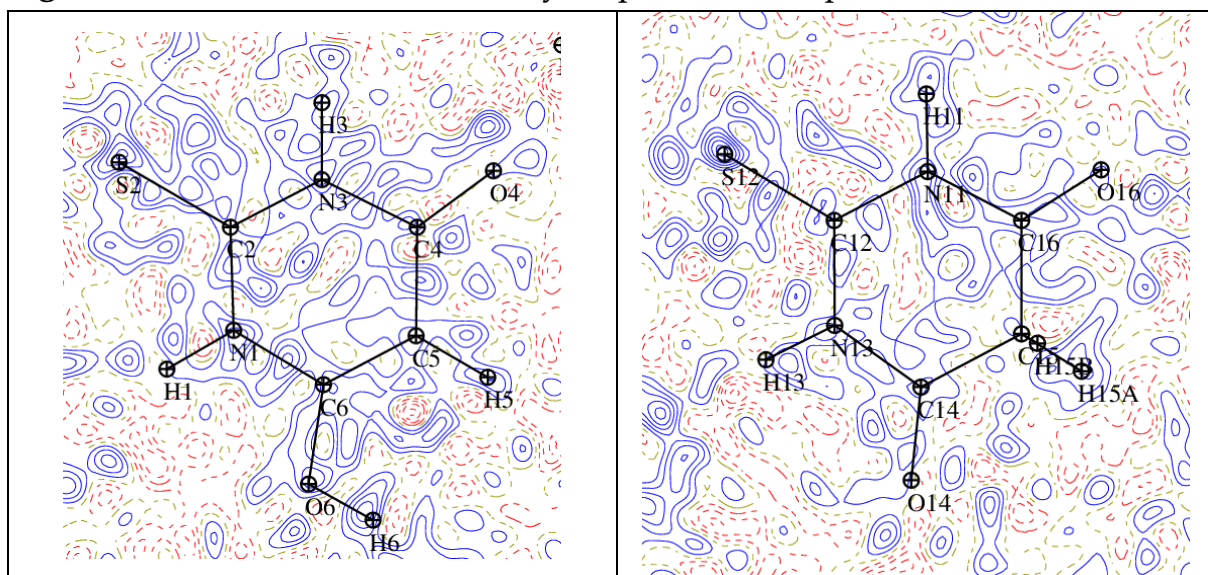

**Table S2.** Bond critical point characteristics. D12: distance between two atoms; Gcp: kinetic energy density (kJ/mol/Bohr<sup>3</sup>); Vcp: potential energy density(kJ/mol/Bohr<sup>3</sup>); LAP: laplacian (bcp) (eÅ<sup>-5</sup>); RHO: electron density (bcp) (eÅ<sup>-3</sup>)]. ELLIP – ellipticity.

| L.p. | atom1 | atom2 | D12    | D1cp   | D2cp   | RHO    | Lapl.  | Hessian matrix |        |       | Ellip. |
|------|-------|-------|--------|--------|--------|--------|--------|----------------|--------|-------|--------|
| cp1  | O14   | C14   | 1.2189 | 0.7882 | 0.4310 | 2.9124 | -31.52 | -29.57         | -24.36 | 22.41 | 0.21   |
| cp2  | O16   | C16   | 1.2296 | 0.7889 | 0.4410 | 2.8708 | -36.09 | -28.29         | -24.04 | 16.25 | 0.18   |
| cp3  | O4    | C4    | 1.2402 | 0.7987 | 0.4422 | 2.8688 | -36.16 | -27.96         | -24.60 | 16.41 | 0.14   |
| cp4  | C2    | N3    | 1.3479 | 0.5586 | 0.7894 | 2.3752 | -25.39 | -20.71         | -17.29 | 12.60 | 0.20   |
| cp5  | N1    | C2    | 1.3522 | 0.8029 | 0.5494 | 2.3538 | -25.88 | -20.18         | -16.97 | 11.26 | 0.19   |
| cp6  | O6    | C6    | 1.3163 | 0.8158 | 0.5008 | 2.3396 | -28.74 | -20.45         | -18.20 | 9.91  | 0.12   |
| cp7  | N11   | C12   | 1.3671 | 0.7704 | 0.5968 | 2.3027 | -21.41 | -19.34         | -16.57 | 14.50 | 0.17   |
| cp8  | C12   | N13   | 1.3614 | 0.5688 | 0.7928 | 2.2743 | -22.95 | -19.24         | -16.03 | 12.33 | 0.20   |
| cp9  | N1    | C6    | 1.3728 | 0.8098 | 0.5638 | 2.2175 | -23.75 | -18.60         | -15.25 | 10.10 | 0.22   |
| cp10 | C5    | C6    | 1.3701 | 0.6174 | 0.7529 | 2.1760 | -20.22 | -17.01         | -12.28 | 9.06  | 0.39   |
| cp11 | N11   | C16   | 1.3715 | 0.8309 | 0.5411 | 2.1417 | -24.68 | -17.79         | -15.03 | 8.13  | 0.18   |
| cp12 | N13   | C14   | 1.3758 | 0.8126 | 0.5635 | 2.1322 | -22.80 | -18.55         | -14.96 | 10.71 | 0.24   |
| cp13 | C4    | C5    | 1.4223 | 0.7203 | 0.7021 | 2.0545 | -18.81 | -16.28         | -12.88 | 10.35 | 0.26   |
| cp14 | N3    | H3    | 1.0090 | 0.7828 | 0.2262 | 2.0324 | -28.59 | -29.05         | -27.78 | 28.24 | 0.05   |
| cp15 | N13   | H13   | 0.9993 | 0.7790 | 0.2204 | 2.0253 | -27.94 | -29.86         | -28.25 | 30.18 | 0.06   |
| cp16 | N1    | H1    | 1.0090 | 0.7901 | 0.2189 | 2.0049 | -29.82 | -29.44         | -27.92 | 27.54 | 0.05   |
| cp17 | N3    | C4    | 1.3944 | 0.8385 | 0.5560 | 1.9936 | -19.90 | -16.43         | -13.59 | 10.12 | 0.21   |
| cp18 | N11   | H11   | 1.0061 | 0.7821 | 0.2241 | 1.9747 | -26.62 | -28.18         | -26.91 | 28.47 | 0.05   |
| cp19 | O6    | H6    | 0.9670 | 0.7830 | 0.1840 | 1.9653 | -30.93 | -34.24         | -34.00 | 37.31 | 0.01   |
| cp20 | C14   | C15   | 1.4969 | 0.7698 | 0.7275 | 1.8321 | -13.16 | -14.02         | -11.76 | 12.61 | 0.19   |
| cp21 | C5    | H5    | 1.0830 | 0.7271 | 0.3560 | 1.7979 | -18.31 | -17.41         | -16.06 | 15.16 | 0.08   |
| cp22 | C15   | H15A  | 1.0882 | 0.7367 | 0.3521 | 1.7905 | -17.44 | -17.17         | -16.63 | 16.37 | 0.03   |
| cp23 | C15   | C16   | 1.4950 | 0.6947 | 0.8005 | 1.7515 | -12.02 | -12.73         | -10.78 | 11.49 | 0.18   |
| cp24 | C15   | H15B  | 1.0925 | 0.6944 | 0.3987 | 1.7410 | -14.34 | -15.12         | -14.39 | 15.17 | 0.05   |
| cp25 | S12   | C12   | 1.6582 | 0.7498 | 0.9086 | 1.5831 | -6.19  | -7.74          | -6.15  | 7.70  | 0.26   |
| cp26 | S2    | C2    | 1.6850 | 0.7771 | 0.9082 | 1.4576 | -4.93  | -7.03          | -5.85  | 7.96  | 0.20   |

**Table S3.** Bond critical points for intermolecular interactions. D12: distance between two atoms; Gcp: kinetic energy density (kJ/mol/Bohr<sup>3</sup>); Vcp: potential energy density(kJ/mol/Bohr<sup>3</sup>); LAP: Laplacian (bcp) (eÅ<sup>-5</sup>); RHO: electron density (bcp) (eÅ<sup>-3</sup>). Symmetry codes: <sup>i</sup> 1-x,1-y,-z; <sup>ii</sup> x,1/2-y,1/2+z; <sup>iii</sup> -1+x,1/2-y,1/2+z; <sup>iv</sup> 1-x,-y,-z; <sup>v</sup> x,1/2-y,-1/2+z; <sup>vi</sup> 1+x,y,z; <sup>vii</sup> 1-x,-1/2+y,-1/2-z; <sup>viii</sup> 1+x,1/2-y,-1/2+z; <sup>ix</sup> 2-x,1-y,-z; <sup>x</sup> 1-x,-1/2+y,1/2-z; <sup>xi</sup> -x,-y,-z

| CP   | Atom1 | Atom2                | Gcp    | Vcp     | D12    | D1cp   | D2cp   | RHO    | LAPL | Hessian matrix |       |      |
|------|-------|----------------------|--------|---------|--------|--------|--------|--------|------|----------------|-------|------|
| cp27 | O16   | H6 <sup>i</sup>      | 111.72 | -111.85 | 1.6832 | 1.1302 | 0.5540 | 0.2793 | 4.10 | -1.67          | -1.66 | 7.44 |
| cp28 | O4    | H11 <sup>ii</sup>    | 110.88 | -100.40 | 1.7062 | 1.1325 | 0.5737 | 0.2448 | 4.46 | -1.41          | -1.37 | 7.24 |
| cp29 | O14   | H1 <sup>iii</sup>    | 90.80  | -72.82  | 1.7779 | 1.1812 | 0.5982 | 0.182  | 3.99 | -0.99          | -0.96 | 5.94 |
| cp30 | S12   | H3 <sup>iv</sup>     | 40.31  | -32.25  | 2.2901 | 1.5509 | 0.7470 | 0.1114 | 1.78 | -0.44          | -0.37 | 2.58 |
| cp31 | S2    | H13 <sup>iv</sup>    | 37.98  | -29.86  | 2.3052 | 1.5411 | 0.7760 | 0.1045 | 1.69 | -0.45          | -0.34 | 2.48 |
| cp32 | O4    | H15B                 | 25.12  | -19.67  | 2.3363 | 1.3797 | 0.9956 | 0.0810 | 1.12 | -0.29          | -0.25 | 1.66 |
| cp33 | O16   | H15B <sup>v</sup>    | 19.47  | -14.50  | 2.4136 | 1.4286 | 1.0177 | 0.0637 | 0.90 | -0.23          | -0.19 | 1.32 |
| cp34 | S12   | C12 <sup>iv</sup>    | 11.87  | -9.00   | 3.4031 | 1.8269 | 1.5815 | 0.0488 | 0.54 | -0.08          | -0.06 | 0.68 |
| cp35 | S2    | C16 <sup>vi</sup>    | 11.76  | -8.62   | 3.3353 | 1.8221 | 1.5239 | 0.0457 | 0.55 | -0.07          | -0.03 | 0.64 |
| cp36 | S2    | C15 <sup>vi</sup>    | 12.80  | -9.10   | 3.4519 | 1.7625 | 1.6925 | 0.0453 | 0.61 | -0.04          | -0.01 | 0.66 |
| cp37 | S12   | N1 <sup>vii</sup>    | 13.07  | -9.15   | 3.3687 | 1.7548 | 1.6307 | 0.0445 | 0.62 | -0.10          | -0.03 | 0.75 |
| cp38 | S2    | H15A <sup>viii</sup> | 9.84   | -7.41   | 2.9660 | 1.8491 | 1.1481 | 0.0431 | 0.45 | -0.13          | -0.09 | 0.68 |
| cp39 | S12   | H5 <sup>v</sup>      | 11.45  | -8.10   | 2.8213 | 1.7975 | 1.0656 | 0.0420 | 0.54 | -0.13          | -0.08 | 0.76 |
| cp40 | O6    | N1 <sup>ix</sup>     | 12.47  | -8.36   | 3.1644 | 1.5415 | 1.6239 | 0.0392 | 0.61 | -0.10          | -0.07 | 0.79 |
| cp41 | S2    | C4 <sup>v</sup>      | 9.76   | -6.63   | 3.4504 | 1.9081 | 1.5752 | 0.0349 | 0.47 | -0.05          | -0.01 | 0.53 |
| cp42 | C5    | C5 <sup>i</sup>      | 7.04   | -4.89   | 3.6531 | 1.8265 | 1.8265 | 0.0301 | 0.34 | -0.08          | -0.03 | 0.44 |
| cp43 | O6    | O6 <sup>ix</sup>     | 9.13   | -5.74   | 3.3143 | 1.6572 | 1.6571 | 0.0274 | 0.46 | -0.06          | -0.01 | 0.54 |
| cp44 | O14   | C5 <sup>x</sup>      | 6.13   | -3.92   | 3.5694 | 1.7158 | 1.8546 | 0.0228 | 0.31 | -0.05          | -0.02 | 0.38 |
| cp45 | S12   | H15B <sup>iv</sup>   | 5.11   | -3.39   | 3.4197 | 1.9906 | 1.5559 | 0.0224 | 0.25 | -0.03          | -0.01 | 0.30 |
| cp46 | O14   | N13 <sup>xi</sup>    | 5.89   | -3.64   | 3.5223 | 1.7267 | 1.8040 | 0.0201 | 0.30 | -0.04          | -0.01 | 0.36 |
| cp47 | O14   | S12 <sup>xi</sup>    | 5.11   | -3.20   | 3.7757 | 1.6983 | 2.0994 | 0.0193 | 0.26 | -0.04          | -0.01 | 0.31 |
| cp48 | N13   | N13 <sup>xi</sup>    | 4.92   | -3.02   | 3.6910 | 1.8455 | 1.8455 | 0.0176 | 0.25 | -0.03          | 0.00  | 0.28 |
